# Supplementary material for: Patrilineal Perspective on the Austronesian Diffusion in Mainland Southeast Asia
Source: PLoS One. 2012 May 7;7(5):e36437. doi: 10.1371/journal.pone.0036437 (PMC3346718; doi:10.1371/journal.pone.0036437)
Supplement: Table S2 [file pone.0036437.s003.xls]

## Sheet: 45Populations
Table S2 Frequencies of 16 NRY haplogroups in 45 populations from Southern China and Southeast Asia.
Population	Cham	Kinh	Lao	Thai	Aheu	Alak	Bit	Bo	Brau	Daw	Inh	Jeh	Kataang	Katu	Khmu	Lamet	Laven	Mal	Ngeq	Oy	So	Suy	Talieng	Xinhmul	Alor	Bali	Borneo	Han	Miao	She	Tujia	Yao	Flores	Java	Lembata	Malay	Mentawai	Moluccas	Nias	Philippines	Sulawesi	Sumatra	Sumba	Taiwan	Vietnamese
C-M216	0.101695	0.118421	0.04	0.176471	0	0	0	0	0	0.254902	0	0	0	0	0.0588235	0.0571429	0.0204082	0	0	0	0	0	0.0285714	0	0.481481	0.0157729	0.223529	0.0609756	0.0517241	0	0.244898	0.206897	0.445876	0.0327869	0.438202	0.03125	0.135135	0.344828	0	0.0208333	0.222222	0	0.575931	0.0208333	0.0428571
D-M174	0	0	0	0	0	0.0322581	0	0	0	0.0784314	0	0	0	0	0	0	0.244898	0	0	0	0	0	0	0.0344828	0	0	0	0.00609756	0.0862069	0	0.0204082	0.0172414	0	0	0	0.03125	0	0	0	0	0	0	0	0	0.0285714
F-M213*	0.0338983	0	0.04	0.0588235	0.0263158	0	0	0	0.03125	0	0	0	0	0	0	0	0.0408163	0	0	0	0	0	0	0	0	0.0488959	0.0352941	0.0121951	0	0	0	0	0.0154639	0.0655738	0.0449438	0.0625	0	0	0	0	0.0740741	0	0	0	0.0285714
K-P131*	0.101695	0.0131579	0	0.0588235	0	0	0	0	0	0	0	0	0	0	0.0392157	0	0.0408163	0	0	0	0.102041	0	0	0	0.518519	0.0394322	0.0588235	0	0	0	0	0	0.350515	0.0327869	0.483146	0.09375	0	0.517241	0	0.479167	0.166667	0.135135	0.26361	0	0
NO-M214*	0	0	0	0	0	0	0	0	0	0	0	0	0	0	0	0	0	0	0	0	0.0204082	0	0	0	0	0	0	0	0	0	0	0	0	0	0	0	0	0	0	0	0	0	0	0	0
N-M231	0	0.0263158	0	0	0	0	0.0357143	0	0	0.0588235	0	0	0	0	0	0	0	0	0	0	0	0	0	0	0	0	0	0.103659	0	0	0.0408163	0	0	0	0	0	0	0	0	0	0	0	0	0	0.0285714
O-M119*	0.0508475	0.0657895	0	0.117647	0	0	0	0.0357143	0	0.0196078	0	0	0	0.0666667	0	0	0.0204082	0	0	0	0	0	0	0	0	0.205047	0.0352941	0.097561	0.0689655	0.0196078	0.0816327	0.0172414	0.0953608	0.131148	0.0337079	0.0625	0.851351	0.0344828	0.866667	0.0208333	0.12963	0.135135	0.0659026	0.708333	0.0571429
O-M122*	0	0.0526316	0.2	0.117647	0	0	0	0.0357143	0.03125	0	0	0	0	0	0.0196078	0	0	0.04	0	0	0	0	0	0	0	0.0126183	0	0.0121951	0	0	0	0	0	0	0	0	0	0	0	0	0	0	0.0200573	0	0
O-M134	0.0169492	0.0921053	0.12	0.117647	0	0.0322581	0.428571	0	0	0.0784314	0.030303	0	0.157895	0	0.137255	0	0.0204082	0.16	0	0.02	0.0204082	0	0.0285714	0.0689655	0	0	0	0.280488	0.103448	0.0588235	0.244898	0.0517241	0	0	0	0.09375	0	0	0	0.0416667	0	0	0	0	0.157143
O-M50	0	0	0	0	0	0	0	0	0	0	0	0	0	0	0	0	0	0	0	0	0	0	0	0	0	0.00788644	0.0588235	0	0	0	0	0	0	0.0163934	0	0	0.0135135	0	0.133333	0.0833333	0.0740741	0	0.0630372	0.1875	0
O-M7	0.0508475	0.105263	0	0	0	0.129032	0	0.0714286	0.25	0.333333	0.0909091	0.46875	0.157895	0.222222	0.0196078	0.0571429	0.122449	0.02	0.485714	0.34	0.0816327	0.025641	0.228571	0	0	0.00788644	0.2	0.0182927	0.362069	0.568627	0.0612245	0.465517	0	0.114754	0	0.125	0	0	0	0.0208333	0	0	0	0	0.0571429
O-M88	0.0847458	0.302632	0.12	0.0588235	0.157895	0.16129	0	0.0357143	0.0625	0.0588235	0	0	0.263158	0	0.0588235	0	0.0204082	0.08	0	0.02	0.122449	0.307692	0.0285714	0.689655	0	0	0	0.054878	0.0689655	0.352941	0	0.0172414	0	0	0	0.03125	0	0	0	0.0208333	0	0	0	0.0208333	0.2
O-M95*	0.305085	0.118421	0.36	0.176471	0.526316	0.548387	0.535714	0.642857	0.59375	0.0588235	0.818182	0.46875	0.131579	0.688889	0.607843	0.857143	0.428571	0.66	0.485714	0.6	0.428571	0.564103	0.628571	0.172414	0	0.569401	0.211765	0.0609756	0.0344828	0	0	0.0172414	0.0463918	0.491803	0	0.3125	0	0	0	0.0208333	0.12963	0.135135	0.00286533	0	0.0714286
O-P191*	0.0169492	0	0.12	0	0.131579	0.0645161	0	0.142857	0.03125	0.0392157	0.0606061	0.0625	0.0526316	0.0222222	0.0392157	0	0.0408163	0.04	0	0.02	0.183673	0.0512821	0.0571429	0.0344828	0	0	0	0.0487805	0	0	0.0408163	0.206897	0	0	0	0	0	0	0	0	0	0	0	0	0.0571429
O-P200*	0.0677966	0.0921053	0	0	0.157895	0	0	0	0	0	0	0	0.210526	0	0.0196078	0.0285714	0	0	0	0	0.0408163	0.0512821	0	0	0	0.0520505	0.152941	0.237805	0.224138	0	0.22449	0	0.0463918	0.0163934	0	0.125	0	0.103448	0	0.291667	0.166667	0.567568	0.00859599	0.0625	0.185714
P-P27.1	0.169492	0.0131579	0	0.117647	0	0.0322581	0	0.0357143	0	0.0196078	0	0	0.0263158	0	0	0	0	0	0.0285714	0	0	0	0	0	0	0.0410095	0.0235294	0.00609756	0	0	0.0408163	0	0	0.0983607	0	0.03125	0	0	0	0	0.037037	0.027027	0	0	0.0857143
