# Supplementary material for: Patrilineal Perspective on the Austronesian Diffusion in Mainland Southeast Asia
Source: PLoS One. 2012 May 7;7(5):e36437. doi: 10.1371/journal.pone.0036437 (PMC3346718; doi:10.1371/journal.pone.0036437)
Supplement: Table S3 [file pone.0036437.s004.xls]

## Sheet: Sheet1
Table S3 Haplotype (near-) matching in the networks.
				Distance to the nearest haplotype*
Haplotype	Sample	Haplogroup	No. Links	ISEA	MSEA
1	Cham149	C-M216	3	2	1
2	Cham052	C-M216	2	3	0
3	Cham101	C-M216	2	1	1
	Cham153	C-M216	2	1	1
4	Cham115	C-M216	1	3	1
5	Cham159	C-M216	1	1	>3
6	Cham099	F-M213*	1	2	>3
7	Cham056	F-M213*	1	1	>3
8	Cham004	K-P131*	1	>3	>3
9	Cham070	K-P131*	1	>3	>3
10	Cham064	K-P131*	1	>3	>3
	Cham108	K-P131*	1	>3	>3
	Cham157	K-P131*	1	>3	>3
11	Cham016	K-P131*	3	3	1
12	Cham011	O-M7	5	>3	1
	Cham124	O-M7	5	>3	1
13	Cham131	O-M7	3	1	2
14	Cham109	O-M88	3	>3	0
15	Cham129	O-M88	1	>3	2
16	Cham151	O-M88	6	>3	0
17	Cham161	O-M88	8	>3	0
	Cham118	O-M88	8	>3	0
18	Cham053	O-M95*	1	3	2
19	Cham057	O-M95*	4	1	0
20	Cham058	O-M95*	3	1	1
21	Cham059	O-M95*	5	1	1
	Cham012	O-M95*	5	1	1
22	Cham076	O-M95*	11	0	0
	Cham163	O-M95*	11	0	0
23	Cham077	O-M95*	7	1	0
24	Cham100	O-M95*	6	1	1
25	Cham113	O-M95*	2	1	1
26	Cham114	O-M95*	4	2	0
27	Cham133	O-M95*	13	0	0
28	Cham065	O-M95*	13	0	0
	Cham158	O-M95*	13	0	0
	Cham138	O-M95*	13	0	0
29	Cham148	O-M95*	1	2	2
30	Cham152	O-M95*	4	0	1
	Cham168	O-M95*	4	0	1
31	Cham143	O-M119	2	3	1
32	Cham110	O-M119	8	0	0
33	Cham147	O-M119	1	3	1
34	Cham061	O-M134	2	>3	1
35	Cham130	O-P191*	1	None	>3
36	Cham098	O-P200*	3	3	2
37	Cham111	O-P200*	7	1	0
38	Cham112	O-P200*	4	>3	0
39	Cham145	O-P200*	2	>3	1
40	Cham054	P-P27.1	2	0	2
41	Cham060	P-P27.1	5	2	0
42	Cham102	P-P27.1	6	0	2
43	Cham119	P-P27.1	1	2	3
44	Cham134	P-P27.1	1	3	3
45	Cham139	P-P27.1	4	1	1
46	Cham146	P-P27.1	3	2	1
47	Cham150	P-P27.1	2	3	2
48	Cham097	P-P27.1	1	>3	>3
	Cham162	P-P27.1	1	>3	>3
Note: * the distance was recorded as number of mutation steps in Y-STRs.
